# Supplementary material
Source: publisher figshare collection journal article supplement (https://acs.figshare.com/ndownloader/files/5781627)

# Asymmetric Synthesis of *cis*-1,2-Dialkenyl-Substituted Cyclopentanes via (–)-Sparteine-Mediated Lithiation and Cycloalkylation of a 9-Chloro-2,7-nonadienyl Carbamate

*Alexander Deiters and Dieter Hoppe\**

Organisch-Chemisches Institut der Universität, Corrensstraße 40, D-48149 Münster, Germany

dhoppe@uni-muenster.de, Telefax: Int +251/8339772

## Supporting Information

**(2*E*,7*E*)-9-(*tert*-Butyldimethylsilyloxy)-nona-2,7-dienyl 2,2,4,4-Tetramethyl-1,3-oxazolidine-3-carboxylate (**7a**).** The alcohol **6** (715 mg, 2.30 mmol, 1.0 equiv), imidazole (391 mg, 5.75 mmol, 2.5 equiv) and TBDMSCl (416 mg, 2.76 mmol, 1.2 equiv) were dissolved in DMF (2 mL). After stirring at room temperature over night, Et<sub>2</sub>O (8 mL) and H<sub>2</sub>O (8 mL) were added, the layers were separated, and the aqueous phase was extracted with Et<sub>2</sub>O (4 × 50 mL). The combined organic phases were dried (MgSO<sub>4</sub>), the solvents were removed in vacuo and the crude product was purified by flash chromatography on silica gel (ether/pentane 1:10). The TBDMS-ether **7a** (817 mg, 83%) was obtained as colorless oil. *t<sub>R</sub>* = 22.2 min (HP1). *R<sub>f</sub>* = 0.34 (ether/pentane 1:5). <sup>1</sup>H NMR (300 MHz, CDCl<sub>3</sub>): δ 0.03-0.11 (m, 6H), 0.89 (s, 9H), 1.35/1.40 (s, 6H), 1.43-1.48 (m, 2H), 1.50/1.54 (s, 6H), 2.04 (dt, *J* = 16.5 Hz, *J* = 7.6 Hz, 4H), 3.70 (s, 2H), 4.10 (dd, *J* = 1.2 Hz, *J* = 5.1 Hz, 2H), 4.51 (d, *J* = 6.3 Hz, 2H), 5.46-5.78 (m, 4H). <sup>13</sup>C NMR (75 MHz, CDCl<sub>3</sub>): (not all signals were visible) δ -5.1, 18.4, 24.1/25.3, 26.0, 26.5, 28.5, 29.8, 59.7, 63.9, 65.1, 76.1/76.4, 95.8, 124.9, 129.7, 130.7, 135.2. IR (neat, cm<sup>-1</sup>): 1700 (C=O).

MS (EI):  $m/z$  425 [1%,  $M^+$ ], 410 [2%,  $(M-CH_3)^+$ ]. Anal. calcd for  $C_{23}H_{43}NO_4Si$  (425.68): C, 64.90; H, 10.18; N, 3.29. Found: C, 65.30; H, 10.58; N, 3.58.

**(2*E*,7*E*)-9-Diethylphosphoryloxy-2,7-nonadienyl 2,2,4,4-Tetramethyl-1,3-oxazolidine-3-carboxylate (7c).** Diethyl chlorophosphate (173 mg, 1.0 mmol) was added to a solution of the alcohol **6** (200 mg, 0.6 mmol) in  $CH_2Cl_2$  (3 mL) and pyridine (0.1 mL) at 0 °C. After stirring for 6 h at 0 °C the reaction was quenched by addition of a sat.  $NH_4Cl$  solution (3 mL). The layers were separated, the aqueous phase was extracted with ether (3 × 20 mL) and the combined organic layers were dried over  $MgSO_4$ . After evaporation of the solvents the crude product was purified by flash chromatography on silica gel (ether/pentane = 1:1 → ether). The phosphate **7c** (185 mg, 65%) was obtained as colorless liquid.  $R_f$  0.20 (ether).  $^1H$  NMR (300 MHz,  $CDCl_3$ ):  $\delta$  1.23-1.52 (m, 20H), 2.01 (q,  $J$  = 7.1 Hz, 4H), 3.65 (s, 2H), 4.04 (quin,  $J$  = 6.9 Hz, 4H), 4.41 (t,  $J$  = 7.4 Hz, 2H), 4.46 (d,  $J$  = 5.7 Hz, 2H), 5.45-5.60 (m, 2H), 5.61-5.78 (m, 4H).  $^{13}C$  NMR (75 MHz,  $CDCl_3$ ):  $\delta$  15.9/16.0, 23.9/25.1/26.3, 27.9, 31.2, 31.3, 59.5/60.4, 63.4, 64.8, 67.8, 75.9/76.2, 94.7/95.6, 124.7, 124.9, 134.7, 135.5, 151.7/152.4. IR (neat,  $cm^{-1}$ ): 1703 (C=O). MS (EI):  $m/z$  447 [2%,  $M^+$ ], 294 [14%,  $(M-OPO(OEt)_2)^+$ ]. Anal. calcd for  $C_{21}H_{38}NO_7P$  (447.50): C, 56.36; H, 8.56; N, 3.13. Found: C, 56.44; H, 8.45; N, 3.44.

**(2*E*,7*E*)-9-Bromo-nona-2,7-dienyl 2,2,4,4-Tetramethyl-1,3-oxazolidine-3-carboxylate (7d).** LiBr (417 mg, 4.80 mmol, 5.0 equiv) was dried in vacuo for 5 h at 100 °C and was added to a solution of **6** (300 mg, 0.96 mmol, 1.0 equiv) in THF (5 mL). The suspension was cooled to -78 °C, treated with *n*-BuLi (0.66 mL, 1.06 mmol, 1.1 equiv, 1.6 M solution in hexane) and stirred for 15 min. After addition of a solution of methanesulfonic acid anhydride (200 mg, 1.16 mmol, 1.2 equiv) in THF (2 mL), the reaction mixture was allowed to warm up to room temperature over night.  $H_2O$  (3 mL) was added, the layers were separated, the aqueous phase was extracted with  $Et_2O$  (5 × 15 mL) and the combined organic phases were dried over  $MgSO_4$ . After evaporation of the solvents, the crude product was purified by flash chromatography on silica gel (ether/pentane 2:5), yielding the bromide **7d** (68 mg, 19%) as a colorless liquid and the alcohol **6** (317 mg, 76%). **7d**:  $t_R$  = 20.3 min (HP1).  $R_f$  = 0.55

(ether/pentane 1:1).  $^1\text{H}$  NMR (300 MHz,  $\text{CDCl}_3$ ):  $\delta$  1.30-1.63 (m, 14 H), 2.07 (q,  $J = 7.1$  Hz, 4H), 3.72 (s, 2H), 3.93 (d,  $J = 6.7$  Hz, 2H), 4.52 (d,  $J = 5.7$  Hz, 2H), 5.54-5.81 (m, 4H).  $^{13}\text{C}$  NMR (75 MHz,  $\text{CDCl}_3$ ):  $\delta$  24.1/25.3/26.5, 28.0, 31.3, 31.5, 40.2, 59.7, 60.6, 65.1, 76.1/76.2, 95.2/95.8, 124.9, 126.8, 134.8, 135.9, 152.6. IR (neat,  $\text{cm}^{-1}$ ): 1695 (C=O). MS (EI):  $m/z$  375 [1%,  $\text{M}(^{81}\text{Br})^+$ ], 373 [1%,  $\text{M}(^{79}\text{Br})^+$ ], 360 [5%,  $(\text{M}(^{81}\text{Br})-\text{CH}_3)^+$ ], 358 [5%,  $(\text{M}(^{79}\text{Br})-\text{CH}_3)^+$ ], 294 [73%,  $(\text{M}-\text{Br})^+$ ]. Anal. calcd for  $\text{C}_{17}\text{H}_{28}\text{BrNO}_3$  (374.31): C, 54.55; H, 7.54; N, 3.74. Found: C, 54.45; H, 7.73; N, 3.87.

**Typical Procedure for the Enantioselective Cyclization-Substitution Sequence. [1Z,2(1R,2R)]-1-Deutero-2-(2-vinylcyclopentyl)-ethenyl 2,2,4,4-Tetramethyl-1,3-oxazolidine-3-carboxylate (13a).**

The chloride **7e** (44 mg, 0.13 mmol, 1.0 equiv) and (–)-sparteine (72 mg, 0.31 mmol, 2.3 equiv) were dissolved in toluene (4 mL) and cooled to  $-86^\circ\text{C}$ . After slow addition of *n*-BuLi (0.19 mL, 0.30 mmol, 2.3 equiv, 1.6 M solution in hexane) the solution was stirred for 2 h.  $\text{CH}_3\text{OD}$  (1 mL) and after 30 min sat.  $\text{NH}_4\text{Cl}$  (aq, 0.5 mL) were added and the reaction mixture was warmed up to room temperature. After pouring the mixture into  $\text{Et}_2\text{O}$  (50 mL), drying with  $\text{MgSO}_4$  and evaporation of the solvents, the crude product was purified by flash chromatography on silica gel (ether/pentane 1:5). The cyclopentane **13a** was obtained in 80% yield (31 mg) as a colorless oil. The enantiomeric excess was determined to 70% by GLC on a BetaDex™ 120 column.  $t_R = 16.6$  min (HP1).  $t_R = 87.7$  min, 89.8 min\* (Beta-Dex™ 120,  $150^\circ\text{C}$ ).  $R_f = 0.29$  (ether/pentane 1:5).  $^1\text{H}$  NMR (300 MHz,  $\text{CDCl}_3$ ):  $\delta$  1.25-1.68 (m, 14H), 1.70-1.90 (m, 4H), 2.52-2.68 (m, 1H), 2.96-3.13 (m, 1H), 3.74 (s, 2H), 4.67 (d,  $J = 8.3$  Hz, 1H), 4.91-5.02 (m, 2H), 5.67-5.83 (m, 1H).  $^{13}\text{C}$  NMR (75 MHz,  $\text{CDCl}_3$ ):  $\delta = 23.2/23.9/25.5$ , 26.7, 30.8, 32.3, 40.0, 48.0, 60.1/60.9, 76.1/76.4, 95.2/96.1, 112.7/112.8, 114.3, 133.9/134.0, 139.9, 149.3/150.1. IR (neat,  $\text{cm}^{-1}$ ): 1716 (C=O). MS (EI):  $m/z$  279 [3%,  $(\text{M}-\text{CH}_3)^+$ ].

**[1Z,2(1R,2R)]-1-Methyl-2-(2-vinylcyclopentyl)-ethenyl 2,2,4,4-Tetramethyl-1,3-oxazolidine-3-carboxylate (13b).** According to the typical procedure for the enantioselective cyclization-substitution sequence, **7e** (100 mg, 0.30 mmol, 1.0 equiv) was reacted with (–)-sparteine (163 mg, 0.70 mmol, 2.3 equiv), *n*-BuLi (0.45 mL, 0.73 mmol, 2.3 equiv, 1.6 M solution in hexane) and  $\text{CH}_3\text{I}$  (0.15 mL, 2.40

mmol, 8.0 equiv) in toluene (3 mL) at  $-78^{\circ}\text{C}$ . After warming up the the reaction mixture to room temperature over night, the described work-up procedure and a subsequent purification of the crude product by flash chromatography on silica gel (ether/pentane 1:10) furnished **13b** in 63% yield (58 mg) as a colorless liquid. The enantiomeric excess was determined to 72% by GLC on a BetaDex™ 120 column.  $t_R = 19.2$  min (HP 1701).  $t_R = 907.1$  min, 925.1 min\* (Beta-Dex™ 120,  $100^{\circ}\text{C}$ ).  $R_f = 0.20$  (ether/pentane 1:10).  $[\alpha]_{\text{D}}^{20} = +32.4$  ( $c = 0.23$ ,  $\text{CHCl}_3$ , 72% ee).  $^1\text{H}$  NMR (300 MHz,  $\text{CDCl}_3$ ):  $\delta$  1.40/1.42 (s, 6H), 1.56 (s, 6H), 1.46-1.84 (m, 6H), 1.88 (s, 3H), 2.54 (ddt,  $J = 7.0$  Hz,  $J = 7.0$  Hz,  $J = 7.0$  Hz, 1H), 2.73-2.80 (m, 1H), 3.74 (s, 2H), 4.93 (m, 2H), 4.98 (m, 1H), 5.78 (m, 1H).  $^{13}\text{C}$  NMR (75 MHz,  $\text{CDCl}_3$ ):  $\delta$  19.8, 23.2, 24.1/25.2/25.4/26.6, 30.7, 31.7, 40.4, 47.7, 59.9/60.8, 76.3/76.5, 95.0/96.0, 114.0, 118.0, 140.2, 144.2, 150.3. IR (neat,  $\text{cm}^{-1}$ ): 1697 (C=O). MS (EI):  $m/z$  307 [3%,  $\text{M}^+$ ], 292 [2%,  $(\text{M}-\text{CH}_3)^+$ ]. ESI-HRMS calcd for  $\text{C}_{18}\text{H}_{29}\text{NO}_3$  (307.43): 330.2045 ( $\text{M}+\text{Na}$ ). Found: 330.2029 ( $\text{M}+\text{Na}$ ).

**[1(2R),2Z,3(1R,2R)]-2-(2,2,4,4-Tetramethyl-1,3-oxazolidine-3-carbamoyloxy)-3-(2-vinylcyclopentyl)-N-(1-phenylethyl)-prop-2-ene-amide (13e)**. According to the typical procedure for the lithiation and substitution, **8** (32 mg, 0.11 mmol, 1.0 equiv), TMEDA (17 mg, 0.15 mmol, 1.4 equiv), *n*-BuLi (0.09 mL, 0.14 mmol, 1.3 equiv, 1.6 M solution in hexane) and (–)-(*R*)-phenylethyl isocyanate (28 mg, 0.19 mmol, 1.7 equiv) were reacted in THF (3 mL). After work-up and purification by flash chromatography on silica gel (ether/pentane 2:5→1:1) the amide **13e** (39 mg, 74%) was obtained as colorless glass-like solid. The minor diastereomer could not be isolated due to the small amount of the starting material.  $t_R = 25.15$  min (HP1).  $R_f = 0.18$  (ether/pentane 1:1).  $[\alpha]_{\text{D}}^{20} = -41.5$  ( $c = 2.65$ ,  $\text{CHCl}_3$ ).  $^1\text{H}$  NMR (300 MHz,  $\text{CDCl}_3$ ):  $\delta$  1.30-1.65 (m, 14H), 1.47 (d, 3H), 1.71-1.86 (m, 4H), 2.57-2.66 (m, 1H), 2.74-2.84 (m, 1H), 3.73/3.74 (s, 2H), 4.94-5.02 (m, 2H), 5.08 (quin,  $J = 7.0$  Hz, 1H), 5.68-5.80 (m, 1H), 5.93 (s, broad, 1H), 6.24/6.26 (d,  $J = 10.3$  Hz, 1H), 7.17-7.33 (m, 5 H).  $^{13}\text{C}$ -NMR (75 MHz,  $\text{CDCl}_3$ ):  $\delta = 21.6, 23.4, 23.9/25.9/25.0/25.4/26.6, 30.7, 31.3, 40.9, 48.1, 48.9, 60.2/61.3, 76.0/76.3, 95.1/96.4, 115.0, 126.0, 127.3, 128.6, 140.2, 128.0, 139.0, 139.9, 149.6, 161.9$ . IR (neat,

cm<sup>-1</sup>): 1724 (C=O), 1648 (C=O). MS (EI): *m/z* 440 [0.3%, M<sup>+</sup>]. Anal. calcd for C<sub>26</sub>H<sub>36</sub>N<sub>2</sub>O<sub>4</sub> (440.58): C, 70.93; H, 8.24; N, 6.36. Found: C, 70.74; H, 8.38; N, 6.29.

**Nonyl 2,2,4,4-Tetramethyl-1,3-oxazolidine-3-carboxylate (21).** To a suspension of NaH (0.50 g, 12.5 mmol, 1.2 equiv, 60% suspension in mineral oil) in THF (15 mL) 1-nonanol (1.50 g, 10.4 mmol, 1.0 equiv) was added. After stirring the reaction mixture for 1 h, a solution of CbyCl (2.40 g, 12.5 mmol, 1.2 equiv) in THF (15 mL) was injected and the reaction mixture was heated to 60 °C for 24 hours. Then H<sub>2</sub>O (7 mL) was added, the layers were separate, the aqueous layer was extracted with ether (3 × 50 mL) and the combined organic layers were dried with MgSO<sub>4</sub>. The solvents were removed in vacuo and the remaining crude product was purified by flash chromatography on silica gel (ether/pentane 2:5) furnishing **21** (2.80 g, 90%) as colorless liquid. *t<sub>R</sub>* = 16.7 min (HP1). *R<sub>f</sub>* = 0.41 (ether/pentane 1:5). <sup>1</sup>H NMR (300 MHz, CDCl<sub>3</sub>): δ 0.86 (t, *J* = 6.8 Hz, 3H), 1.20-1.71 (m, 26H), 3.70 (s, 2H), 4.05 (t, *J* = 6.7 Hz, 2H). <sup>13</sup>C NMR (75 MHz, CDCl<sub>3</sub>): δ 14.0, 24.2/25.3/26.5, 22.6, 26.1, 28.9, 29.1, 29.2, 29.5, 31.8, 59.6/60.5, 64.6, 76.2/76.4, 94.8/95.8, 152.7. IR (neat, cm<sup>-1</sup>): 1695 (C=O). MS (EI): *m/z* 284 [100%, (M-CH<sub>3</sub>)<sup>+</sup>]. Anal. calcd for C<sub>17</sub>H<sub>33</sub>NO<sub>3</sub> (299.45): C, 68.19; H, 11.11; N, 4.68. Found: C, 68.03; H, 11.10; N, 5.02.

***rac*-(2*E*,7*E*)-9-Chloro-1-(trimethylstannyl)-nona-2,7-dienyl 2,2,4,4-Tetramethyl-1,3-oxazolidine-3-carboxylate (*rac*-22).** *Synthesis of the racemate:* The carbamate **7e** (100 mg, 0.30 mmol, 1.0 equiv), TMEDA (60 mg, 0.52 mmol, 1.7 equiv) and (CH<sub>3</sub>)<sub>3</sub>SnCl (0.45 mL, 0.45 mmol, 1.5 equiv, 1 M solution in hexane) were dissolved in toluene (4 mL) and cooled to -78 °C. After addition of *s*-BuLi (0.35 mL, 0.39 mmol, 1.3 equiv, 1.1 M solution in hexane/cyclohexane) and stirring for 30 min at this temperature, the reaction was quenched by addition of CH<sub>3</sub>OH (0.5 mL) and NH<sub>4</sub>Cl (aq, 0.5 mL). After warming up to ambient temperature, the reaction mixture was poured into Et<sub>2</sub>O (70 mL) and dried with MgSO<sub>4</sub>. The solvents were evaporated and the remaining crude product was purified by flash chromatography on silica gel (ether/pentane 1:10→1:5) yielding *rac*-**22** (23 mg, 15%) as a colorless liquid, **8** (19 mg, 4%) and **13d** (48 mg, 48%). *t<sub>R</sub>* = 21.9 min (HP1). *R<sub>f</sub>* = 0.50 (ether/pentane 1:5). <sup>1</sup>H NMR (300 MHz, CDCl<sub>3</sub>):

$\delta$  -0.11 (s, 9H), 1.31-1.62 (m, 14H), 2.06 (q,  $J = 6.8$  Hz, 4H), 3.72 (s, 2H), 4.02 (dd,  $J = 6.9$  Hz,  $J = 0.7$  Hz, 2H), 5.05 (m, 1H), 5.26-5.44 (m, 4H).  $^{13}\text{C}$  NMR (75 MHz,  $\text{CDCl}_3$ ):  $\delta$  (not all signals were visible) -9.1, 24.2/25.3/26.6, 29.0, 31.4, 31.8, 45.4, 59.6/60.6, 72.0, 76.2, 94.8/95.9, 124.4, 126.2, 130.2, 135.8. IR (neat,  $\text{cm}^{-1}$ ) 1679 (C=O). MS (EI):  $m/z$  458 [6%, ( $\text{M}(^{120}\text{Sn})\text{-Cl}$ ) $^+$ ], 456 [4%, ( $\text{M}(^{118}\text{Sn})\text{-Cl}$ ) $^+$ ], 454 [2%, ( $\text{M}(^{116}\text{Sn})\text{-Cl}$ ) $^+$ ]. HRMS calcd for  $\text{C}_{20}\text{H}_{36}\text{ClNO}_3\text{Sn}$  (492.64): 458.17172 ( $\text{M}(^{120}\text{Sn})\text{-Cl}$ ). Found: 458.17286 ( $\text{M}(^{120}\text{Sn})\text{-Cl}$ ).

#

$^1\text{H}$  NMR spectra of all new compounds.

Deiters 85/F2  
Protonen-Spektrum

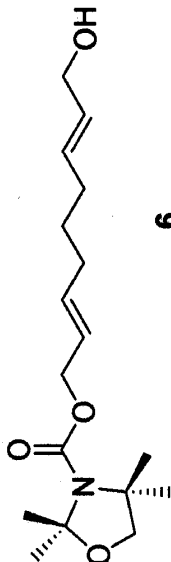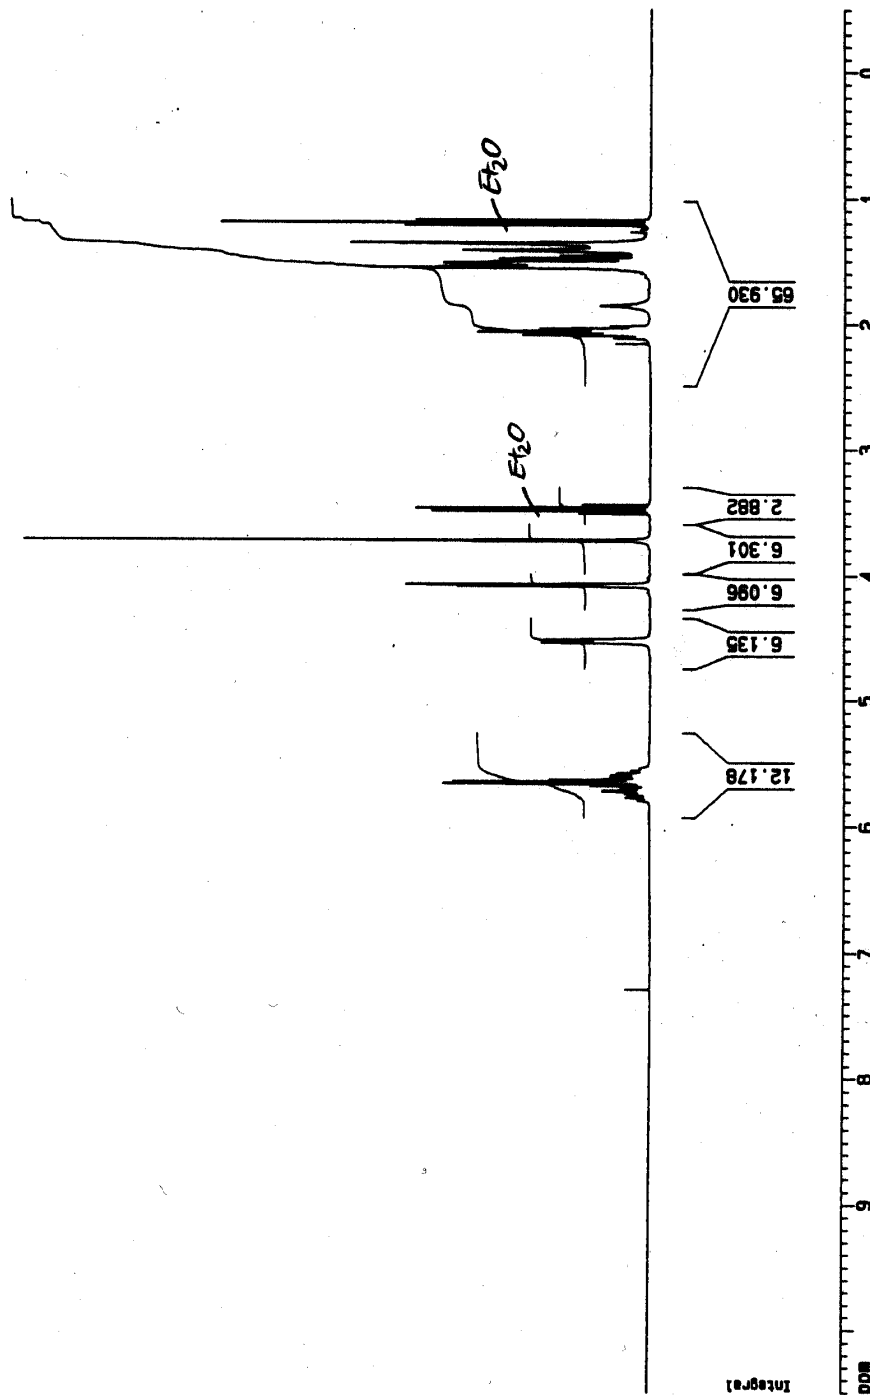

Current Data Parameters  
NAME Aug20  
EXPNO 491  
PROCNO 1

F2 - Acquisition Parameters  
Date 970621  
Time 0.19  
PULPROG zg30  
SOLVENT CDCl3  
AQ 4.1943240 sec  
FIDRES 0.119209 Hz  
DM 128.0 usec  
NS 256  
NUCLEUS 1H  
D1 0.1000000 sec  
P1 9.2 usec  
DE 160.0 usec  
SF01 300.1350537 MHz  
SH 3906.25 Hz  
TO 32768  
MS 40  
DS 0

F1 - Processing Parameters  
SI 16384  
SF 300.1333569 MHz  
OFFSE1 12.161 ppm  
SR 3356.90 Hz  
HZFT 0.238419 Hz  
WDW EM  
LB 0.00 Hz  
GB 0

1D NMR plot parameters  
CX 22.00 cm  
CY 10.00 cm  
FIP 10.500 ppm  
F1 3151.40 Hz  
F2 -0.500 ppm  
FZ -150.07 Hz  
PPHON 0.50000 ppm/cm  
HZON 150.06668 Hz/cm

Deiters BR 7/F1  
Protonen-Spektrum

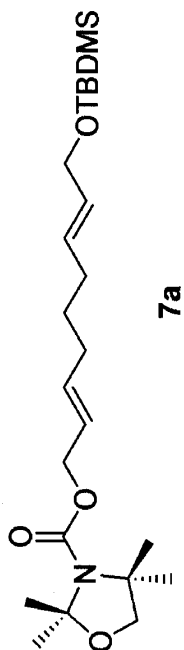

Current Data Parameters  
NAME Jun10  
EXPNO 261  
PROCNO 1

F2 - Acquisition Parameters  
Date 990611  
Time 1.21  
PULPROG zg30  
SOLVENT CDCl3  
AQ 4.1943240 sec  
FIDRES 0.119209 Hz  
AQ 128.0 usec  
RG 360  
NUCLEUS 1H  
D1 0.1000000 sec  
P1 9.2 usec  
DE 160.0 usec  
SF01 300.1350537 MHz  
SWH 3506.25 Hz  
TD 32768  
MS 40  
DS 0

F1 - Processing Parameters  
SI 16384  
SF 300.1333835 MHz  
OFFSE1 12.072 ppm  
SR 3383.53 Hz  
HZPPT 0.238419 Hz  
WDW EM  
LB 0.00 Hz  
GB 0

1D NMR plot parameters  
CX 22.00 cm  
CY 10.00 cm  
F1P 10.500 ppm  
F1 3151.40 Hz  
F2P -0.500 ppm  
F2 -150.07 Hz  
PPHCH 0.50000 ppm/cm  
HZCH 150.06670 Hz/cm

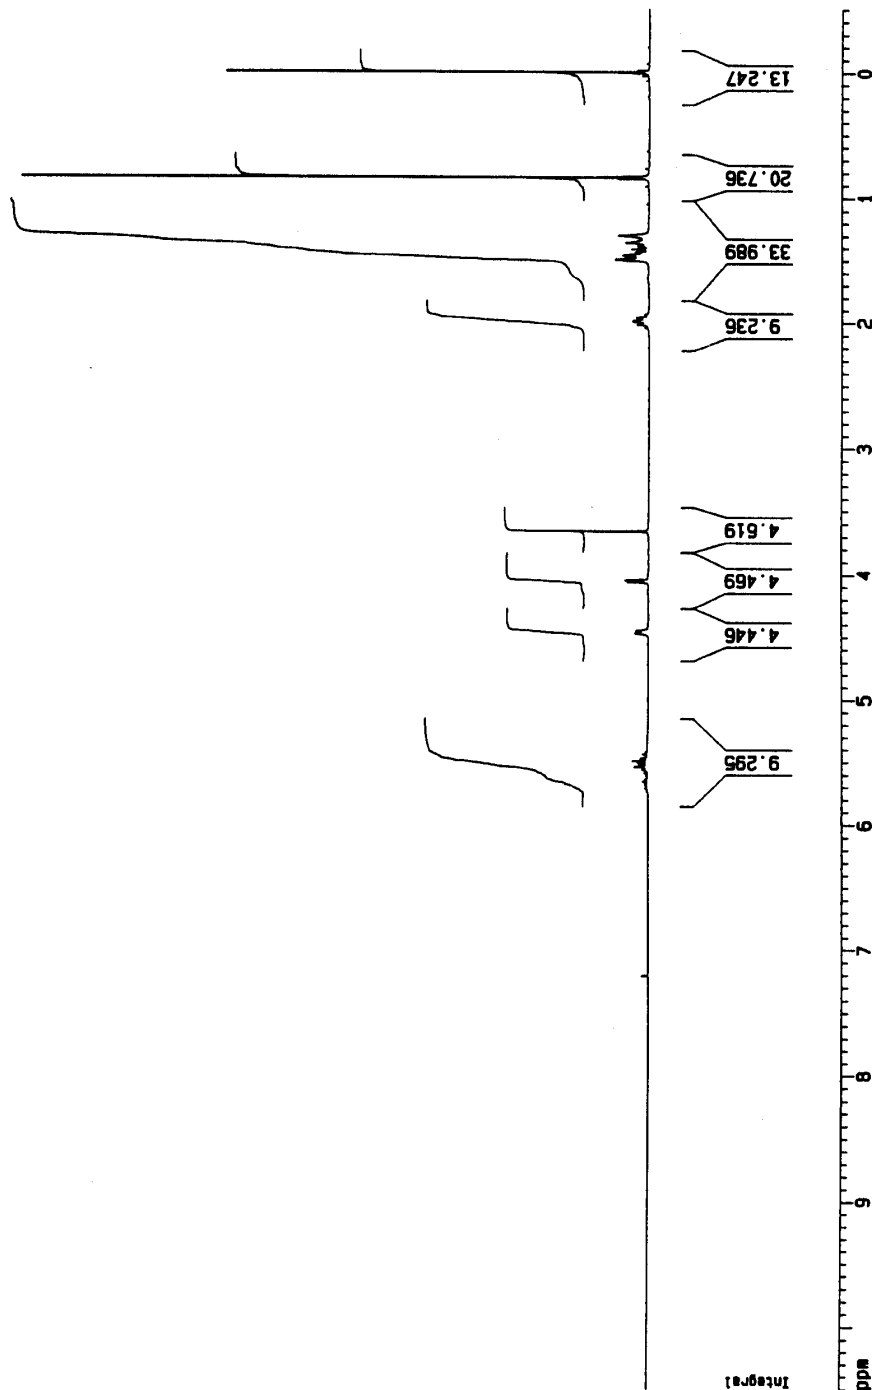



Deiters 85/F1

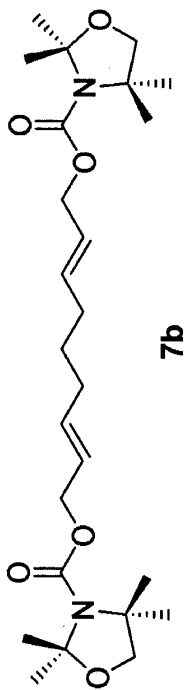

7b

Current Data Parameters  
 NAME Aug19  
 EXPNO 100  
 PROCNO 1

F2 - Acquisition Parameters  
 Date 970819  
 Time 12.55  
 PULPROG zg30  
 SOLVENT CDCl3  
 A0 4.1943240 sec  
 FIDRES 0.119209 Hz  
 DQ 128.0 usec  
 R6 360  
 NUCLEUS 1H  
 D1 0.1000000 sec  
 P1 9.2 usec  
 DE 160.0 usec  
 SF01 300.1350537 MHz  
 SMH 3906.25 Hz  
 TO 32768  
 NS 40  
 DS 0

F1 - Processing Parameters  
 SI 16384  
 SF 300.1333607 MHz  
 OFFSET 12.149 ppm  
 SR 3360.66 Hz  
 HZQPT 0.239419 Hz  
 MCM CM  
 LB 0.00 Hz  
 GB 0

1D NMR plot parameters  
 CX 22.00 cm  
 CY 10.00 cm  
 F1P 10.500 ppm  
 F1 3151.40 Hz  
 F2P -0.500 ppm  
 F2 -150.07 Hz  
 PPMCH 0.50000 ppm/cm  
 HZCH 150.06568 Hz/cm

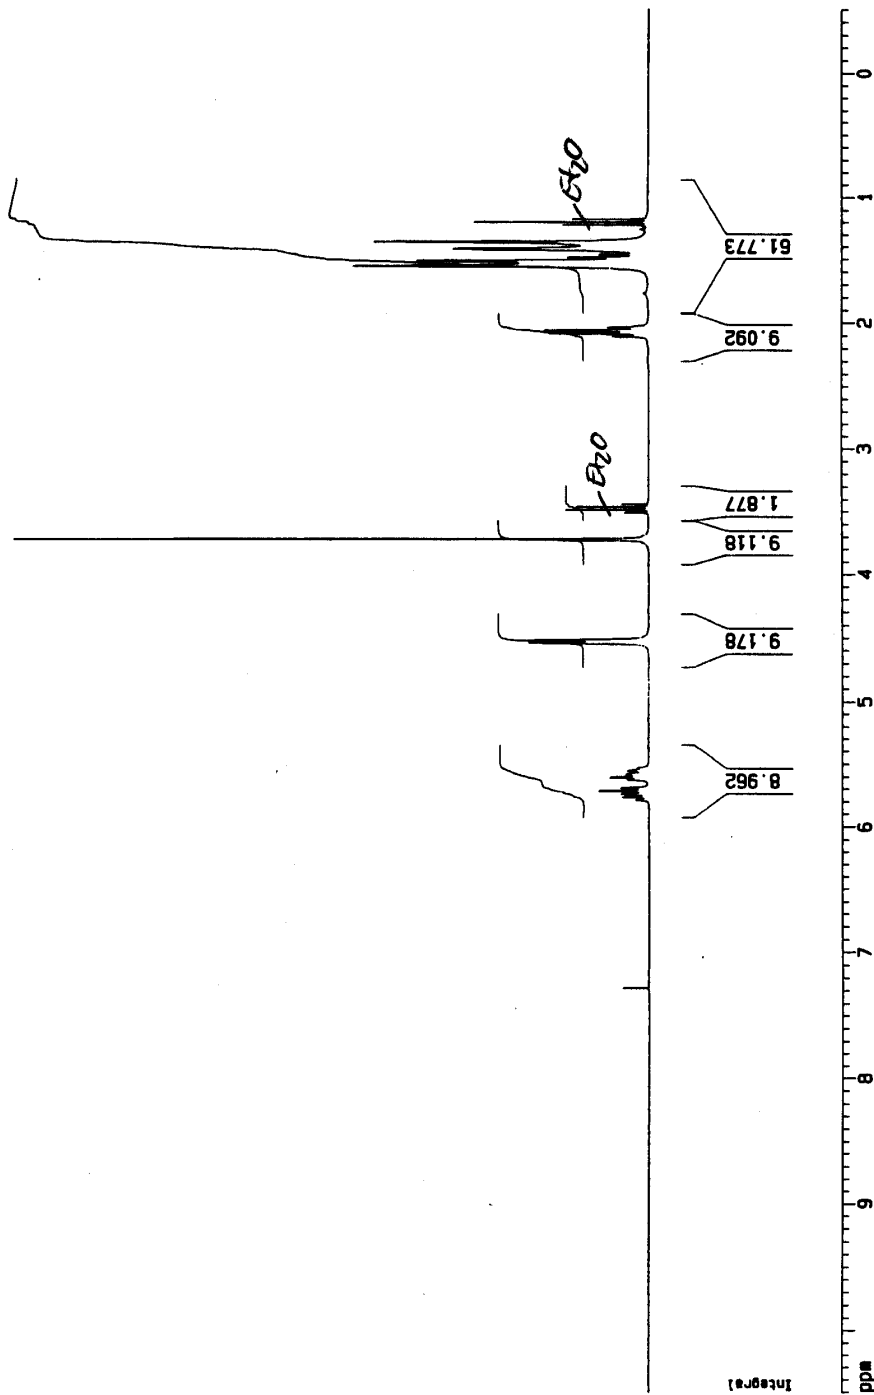

Deiters 111  
Protonen-Spektrum

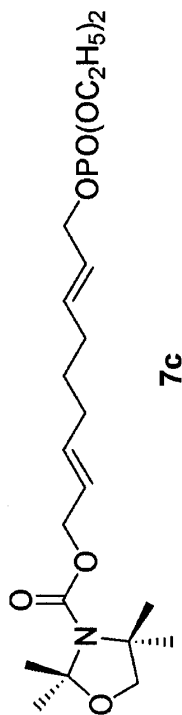

Current Data Parameters  
NAME Sep19  
EXPNO 261  
PROCNO 1

F2 - Acquisition Parameters  
Date 970920  
Time 0.43  
PULPROG zg30  
SOLVENT CDCl3  
AQ 4.1943240 sec  
FIDRES 0.119209 Hz  
AQ 128.0 usec  
RG 180  
NUCLEUS 1H  
D1 0.1000000 sec  
P1 9.2 usec  
DE 160.0 usec  
SF01 300.1350537 MHz  
SMH 3906.25 Hz  
TD 32768  
NS 40  
DS 0

F1 - Processing Parameters  
SI 16384  
SF 300.1333769 MHz  
OFFSET 12.094 ppm  
SR 3376.90 Hz  
HZOPT 0.238419 Hz  
MOW EN  
LB 0.00 Hz  
GB 0

10 NMR plot parameters  
CX 22.00 cm  
CY 10.00 cm  
F1P 10.500 ppm  
F1 3151.40 Hz  
F2P -0.500 ppm  
F2 -150.07 Hz  
PPMCH 0.50000 ppm/cm  
HZCH 150.06668 Hz/cm

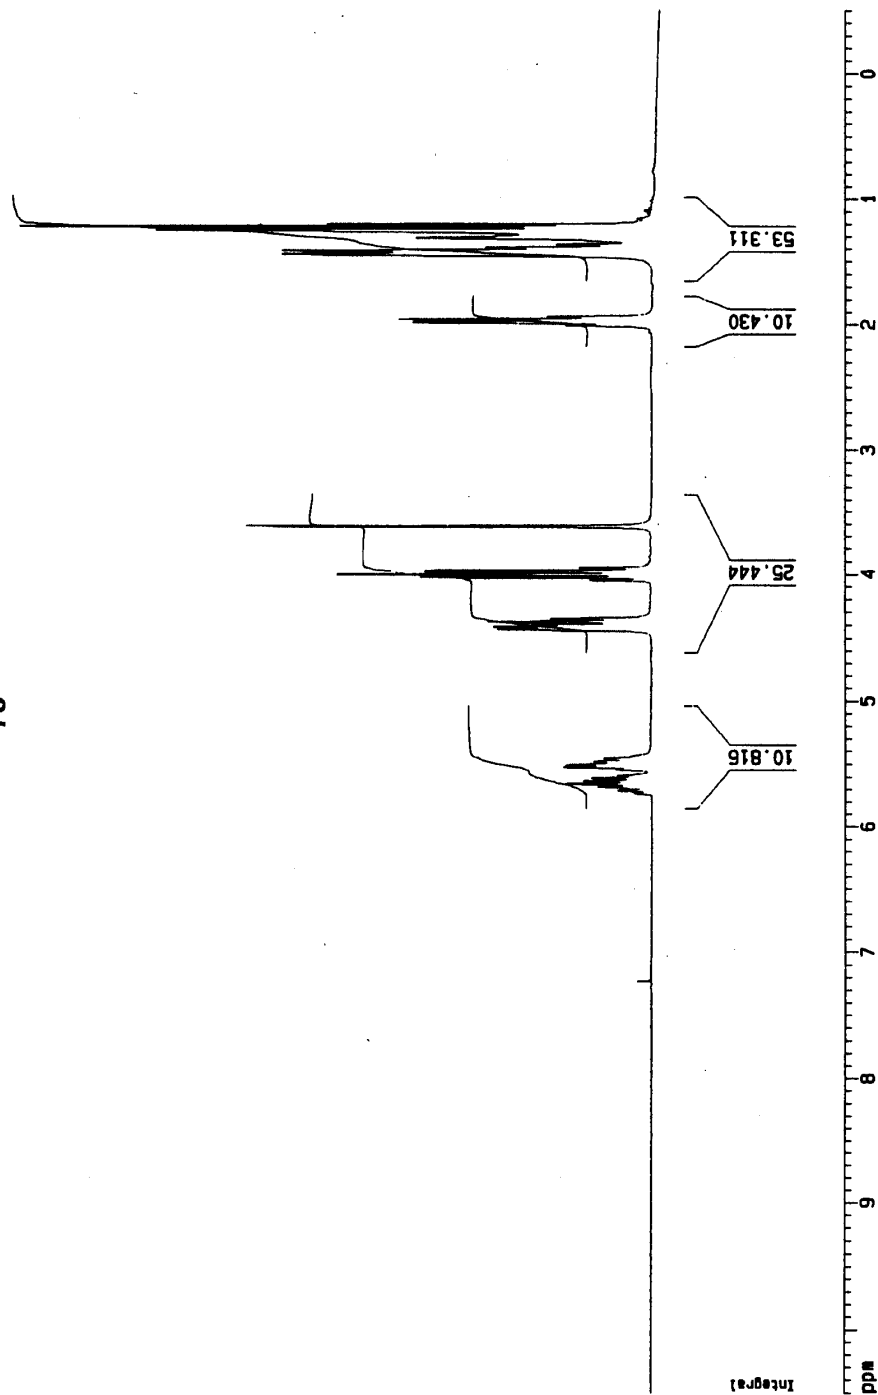

Deiters AD 205  
Protonen-Spektrum

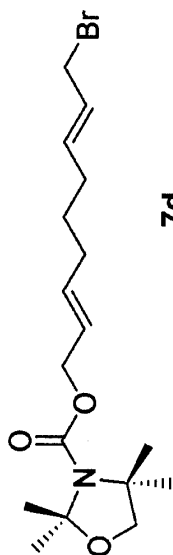

Current Data Parameters  
NAME Mar16  
EXPNO 341  
PROCNO 1

F2 - Acquisition Parameters  
Date 980316  
Time 20.12  
PULPROG zg30  
SOLVENT CDCl3  
AQ 4.1943240 sec  
FIDRES 0.119209 Hz  
DM 128.0 usec  
RG 512  
NUCLEUS <sup>1</sup>H  
D1 0.1000000 sec  
P1 9.2 usec  
DE 160.0 usec  
SF01 300.1350537 MHz  
SMH 3906.25 Hz  
TO 32768  
NS 40  
DS 0

F1 - Processing Parameters  
SI 16384  
SF 300.1334072 MHz  
OFFSET 11.994 ppm  
SR 3407.18 Hz  
HZOPT 0.238419 Hz  
MAG 0.00 Hz  
LB 0.00 Hz  
GB 0

1D NMR plot parameters  
CX 22.00 cm  
CY 10.00 cm  
FIP 10.500 ppm  
F1 3151.40 Hz  
F2P -0.500 ppm  
F2 -150.07 Hz  
PPMCH 0.50000 ppm/cm  
HZCH 150.06670 Hz/cm

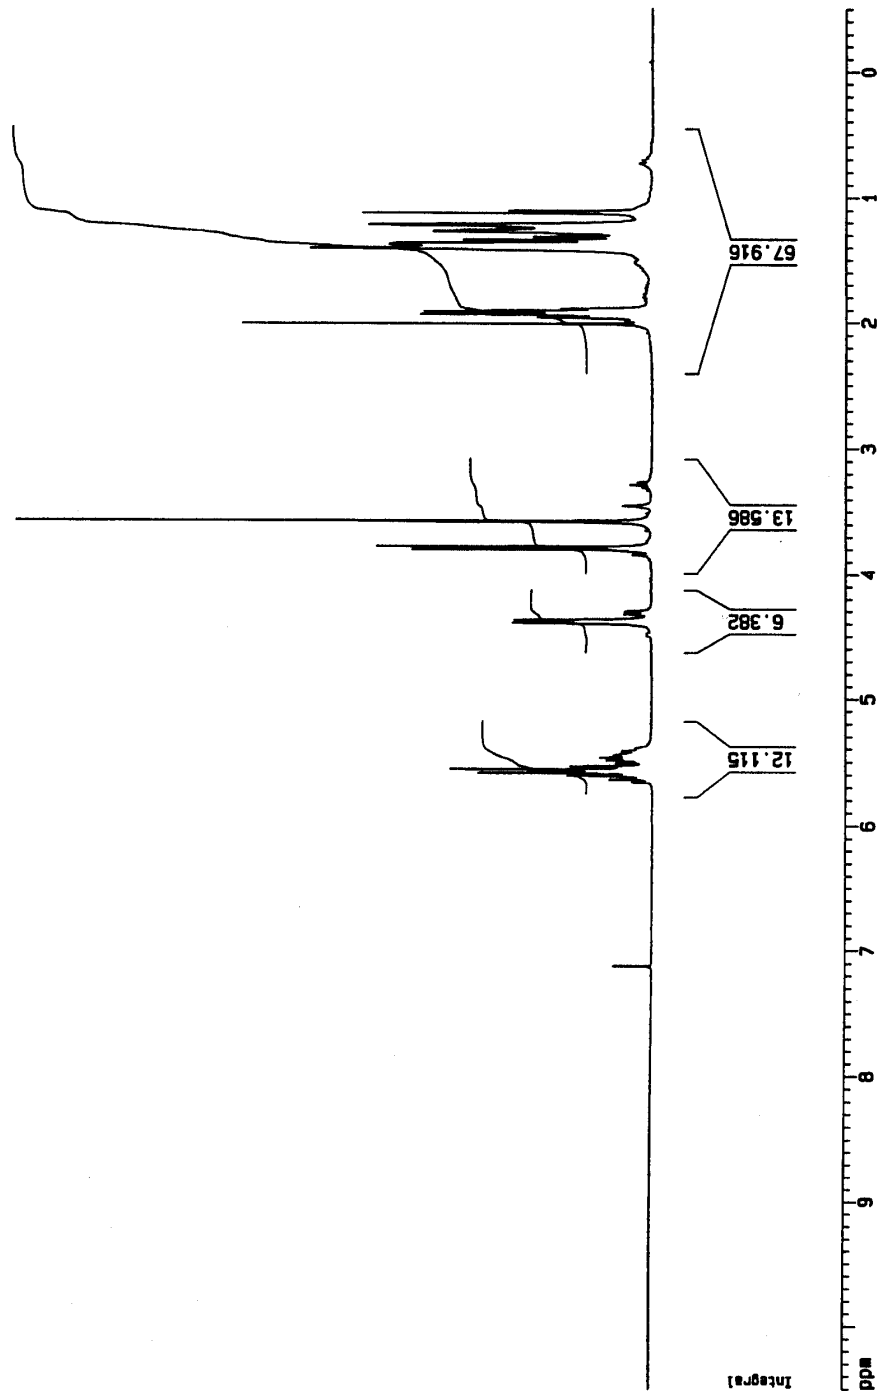

Deiters 103

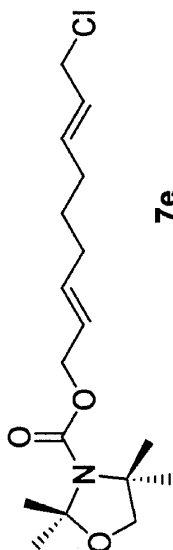

7e

Current Data Parameters  
 NAME Sep10  
 EXPNO 400  
 PROCNO 1

F2 - Acquisition Parameters  
 Date 970911  
 Time 10.42  
 PULPROG zg30  
 SOLVENT CDCl3  
 AQ 4.1943240 sec  
 FIDRES 0.119209 Hz  
 DM 128.0 usec  
 RG 256  
 NUCLEUS 1H  
 D1 0.1000000 sec  
 P1 9.2 usec  
 DE 160.0 usec  
 SF01 300.1350537 MHz  
 SMH 3906.25 Hz  
 TD 32768  
 NS 40  
 DS 0

F1 - Processing Parameters  
 SI 16384  
 SF 300.1333411 MHz  
 OFFSET 12.214 ppm  
 SR 3341.14 Hz  
 HZPFT 0.238419 Hz  
 MCW EN  
 LB 0.00 Hz  
 GB 0

1D NMR plot parameters  
 CX 22.00 cm  
 CY 10.00 cm  
 FJP 10.500 ppm  
 F1 3151.40 Hz  
 F2P -0.500 ppm  
 F2 -150.07 Hz  
 PPMCH 0.50000 ppm/cm  
 HZCH 150.06667 Hz/cm

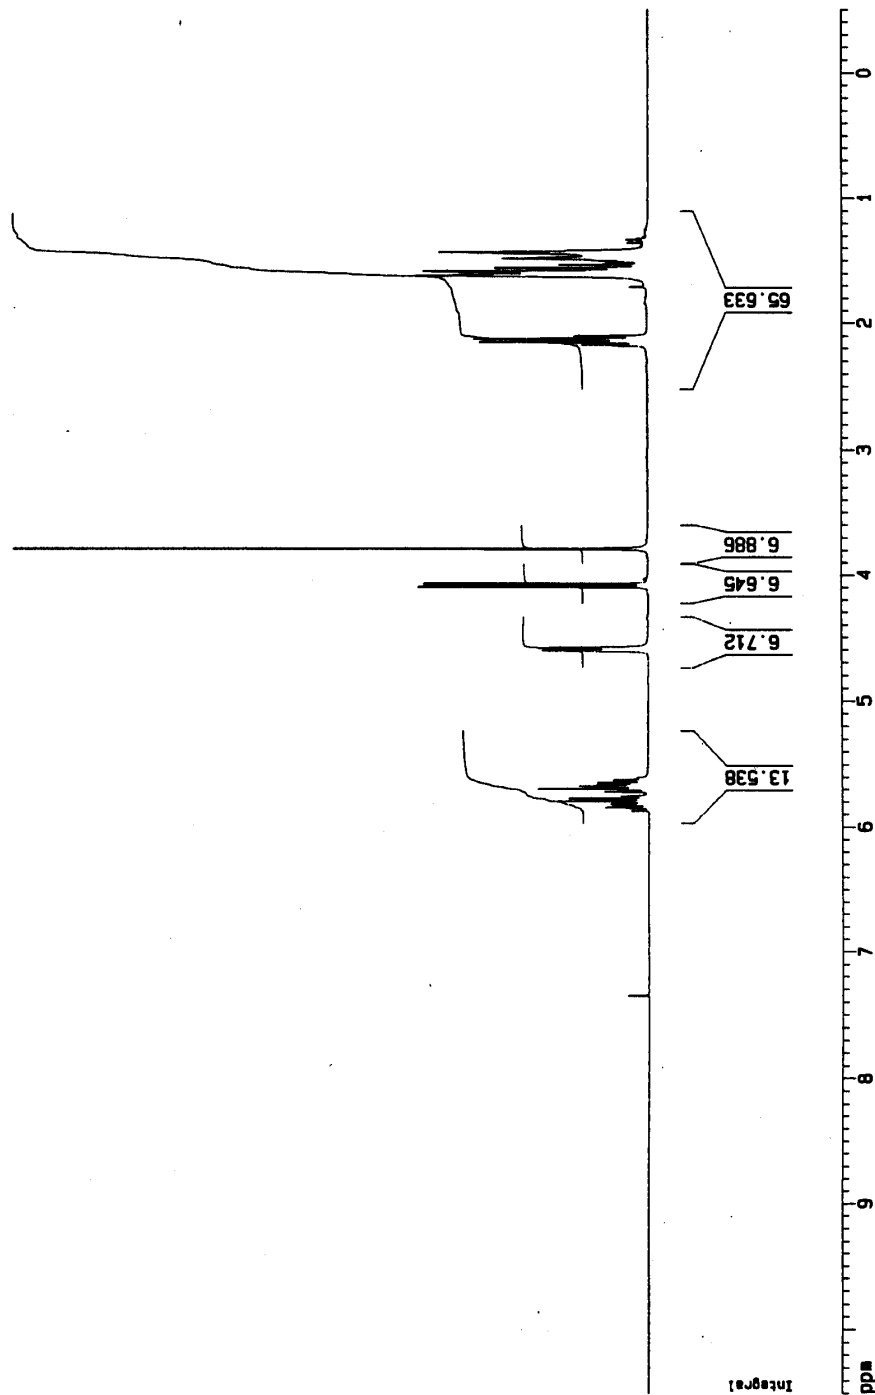

Deiters 254/F2

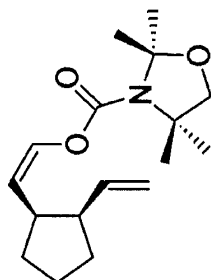

8

Current Data Parameters  
NAME Jun08  
EXPNO 450  
PROCNO 1

F2 - Acquisition Parameters  
Date 980509  
Time 12.22  
PULPROG zgpg30  
SOLVENT CDCl3  
AQ 4.1943240 sec  
FIDRES 0.119209 Hz  
AQ 128.0 usec  
RG 715  
NUCLEUS 1H  
D1 0.100000 sec  
P1 9.2 usec  
DE 160.0 usec  
SF01 300.1350337 MHz  
SH 3906.25 Hz  
TD 32768  
NS 40  
DS 0

F1 - Processing Parameters  
SI 16384  
SF 300.1333879 MHz  
OFFSE 12.058 ppm  
SR 3387.92 Hz  
HZPPT 0.238419 Hz  
MCW EN  
LB 0.00 Hz  
GB 0

1D NMR plot parameters  
CX 22.00 cm  
CY 10.00 cm  
F1P 10.500 ppm  
F1 3151.40 Hz  
F2P -0.500 ppm  
F2 -150.07 Hz  
PPMCH 0.50000 ppm/cm  
HZCH 150.06670 Hz/cm

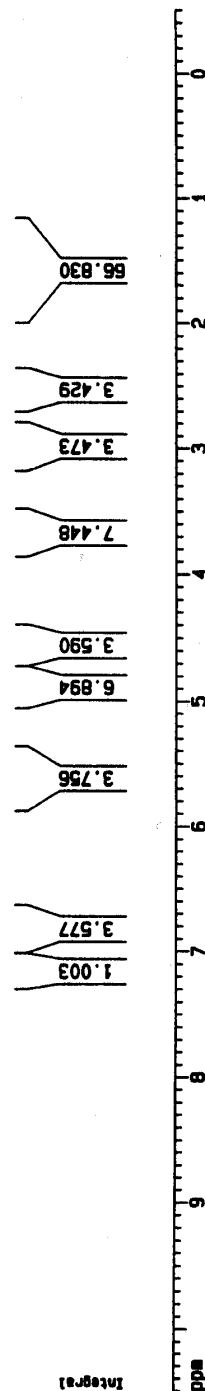

Deiters 224/F1

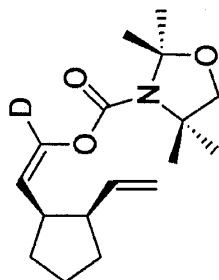

13a

Current Data Parameters  
 NAME Nov19  
 EXPNO 270  
 PROCNO 1

F2 - Acquisition Parameters  
 Date 971119  
 Time 13.00  
 PULPROG zgpg30  
 SOLVENT CDCl3  
 AQ 4.1943240 sec  
 FIDRES 0.119209 Hz  
 DM 128.0 usec  
 RG 1024  
 NUCLEUS 1H  
 D1 0.1000000 sec  
 P1 9.2 usec  
 DE 150.0 usec  
 SF01 300.1350537 MHz  
 SSB 3906.25 Hz  
 TO 32768  
 NS 40  
 DS 0

F1 - Processing Parameters  
 SI 16394  
 SF 300.1333894 MHz  
 OFFSET 12.055 ppm  
 SR 3388.44 Hz  
 HZQPT 0.238419 Hz  
 MCH EN  
 LB 0.00 Hz  
 GB 0

1D NMR plot parameters  
 CX 22.00 cm  
 CY 10.00 cm  
 F1P 10.500 ppm  
 F1 3151.40 Hz  
 F2P -0.500 ppm  
 F2 -150.07 Hz  
 PPMCH 0.50000 ppm/cm  
 HZCH 150.06670 Hz/cm

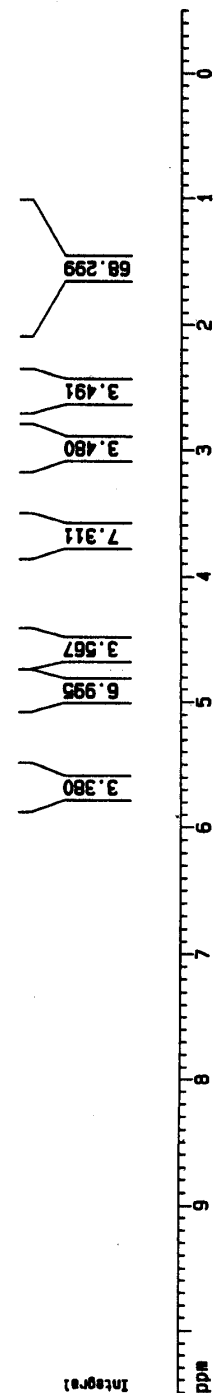

Deiters BR 27/F1  
Protonen-Spektrum

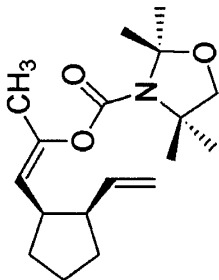

13b

Current Data Parameters  
NAME Jul02  
EXPNO 321  
PROCNO 1

F2 - Acquisition Parameters  
Date 990703  
Time 2.54  
PULPROG zgpg30  
SOLVENT CDCl3  
AQ 4.1943240 sec  
FIDRES 0.119209 Hz  
DM 128.0 usec  
RG 715  
NUCLEUS 1H  
D1 0.1000000 sec  
P1 9.2 usec  
DE 160.0 usec  
SF01 300.1350537 MHz  
SM 3906.25 Hz  
TD 32768  
NS 120  
DS 0

F1 - Processing Parameters  
SI 16384  
SF 300.1333876 MHz  
OFFSET 12.069 ppm  
SR 3387.62 Hz  
HZQPT 0.238419 Hz  
MOM EN  
LB 0.00 Hz  
GB 0

10 NMR plot parameters  
CX 22.00 cm  
CY 10.00 cm  
FIP 10.500 ppm  
F1 3151.40 Hz  
F2P -0.500 ppm  
F2 -150.07 Hz  
PPMCH 0.50000 ppm/cm  
HZCM 150.06670 Hz/cm

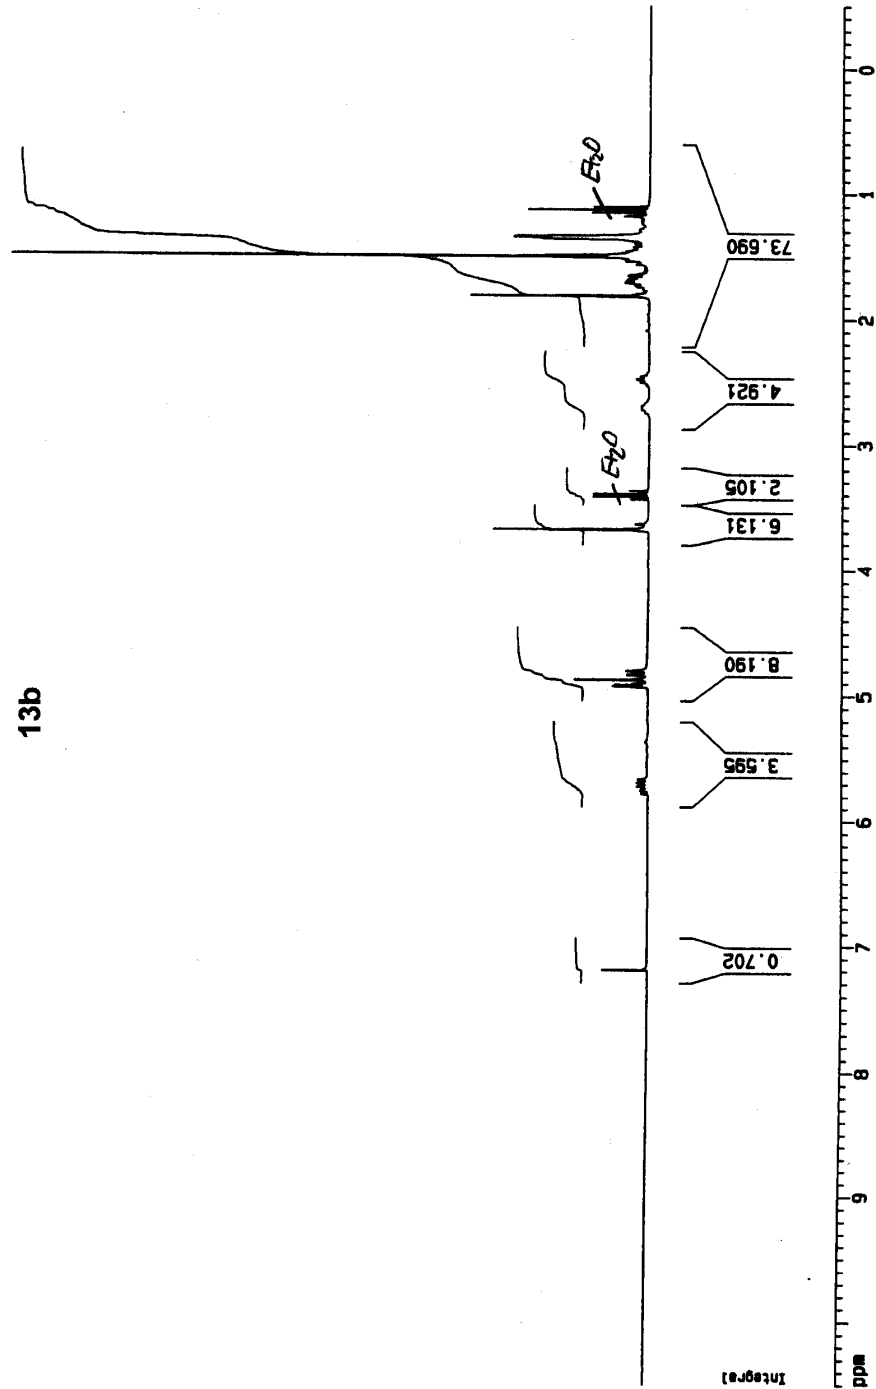

Deiters 253/F1  
Protonen-Spektrum

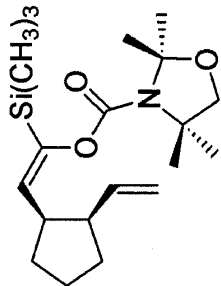

13c

Current Data Parameters  
NAME Jun18  
EXPNO 531  
PROCNO 1

F2 - Acquisition Parameters  
Date 980619  
Time 17.52  
PULPROG zg30  
SOLVENT CDCl3  
AQ 4.1943240 sec  
FIDRES 0.119209 Hz  
DM 128.0 usec  
RG 715  
NUCLEUS 1H  
D1 0.100000 sec  
P1 9.2 usec  
DE 160.0 usec  
SF01 300.1350537 MHz  
SMH 3906.25 Hz  
TD 32768  
NS 120  
DS 0

F1 - Processing Parameters  
SI 16384  
SF 300.1334074 MHz  
OFFSET 11.993 ppm  
SR 3407.43 Hz  
HZPPT 0.238419 Hz  
MCH EN  
LB 0.00 Hz  
GB 0

1D NMR plot parameters  
CX 22.00 cm  
CY 10.00 cm  
FIP 10.500 ppm  
F1 3151.40 Hz  
F2 -0.500 ppm  
F2 -150.07 Hz  
PPMCH 0.50000 ppm/cm  
HZCH 150.06670 Hz/cm

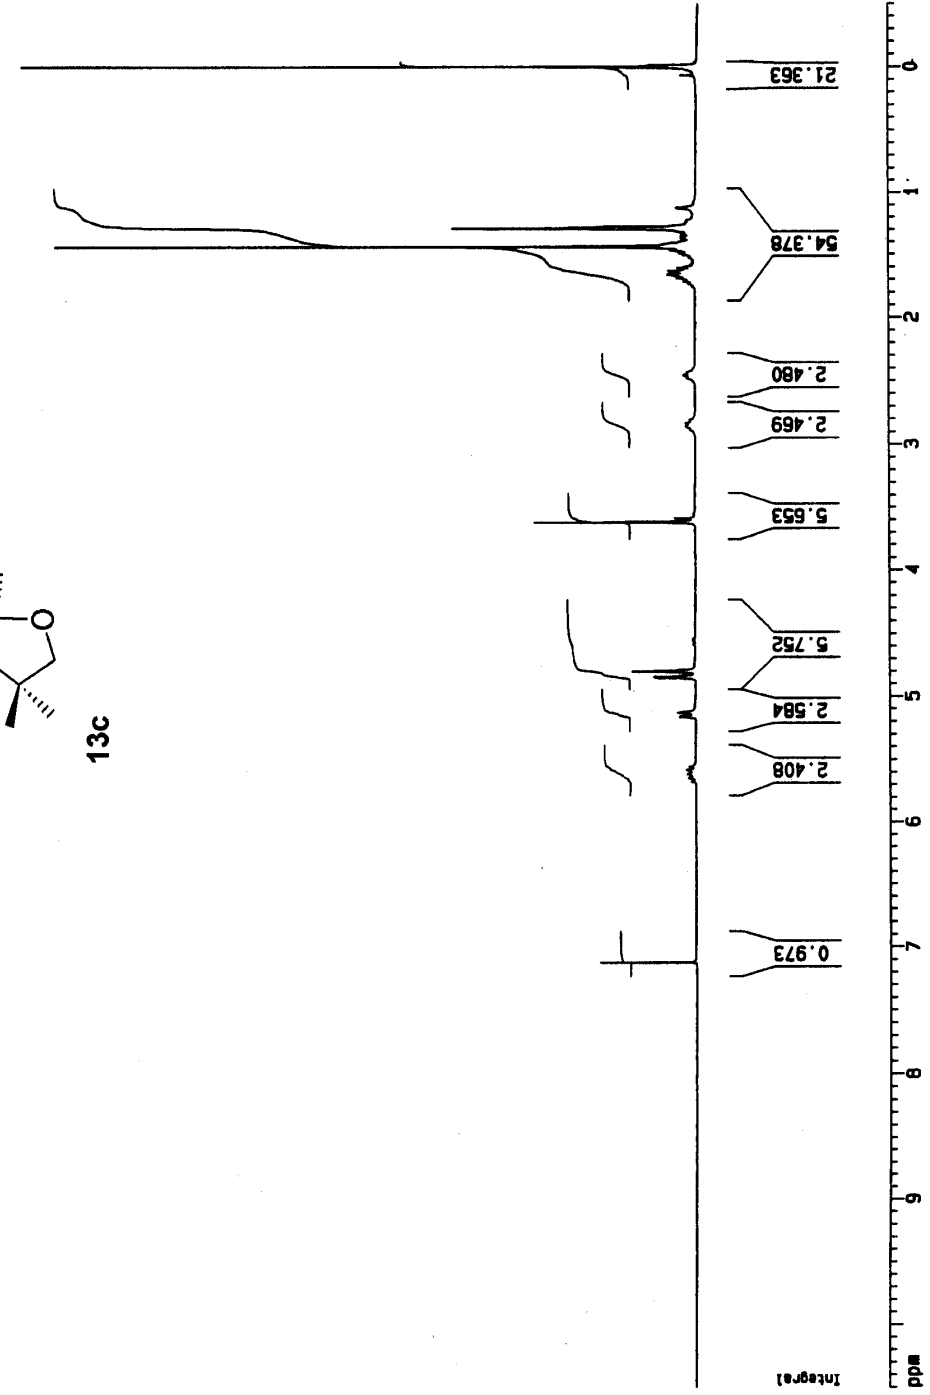



Deiters 208/F1  
Protonen-Spektrum

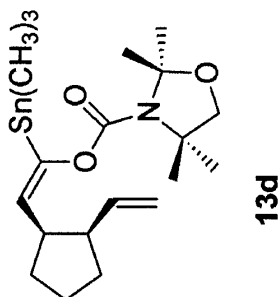

Current Data Parameters  
NAME Apr-03  
EXPNO 551  
PROCNO 1

F2 - Acquisition Parameters  
Date 980404  
Time 13.20  
PULPROG zg30  
SOLVENT CDCl3  
AQ 4.1943240 sec  
FIDRES 0.119209 Hz  
DM 128.0 usec  
RG 1024  
NUCLEUS 1H  
D1 0.1000000 sec  
P1 9.2 usec  
DE 180.0 usec  
SF01 300.1324537 MHz  
SH 3906.25 Hz  
TD 32768  
NS 120  
DS 0

F1 - Processing Parameters  
SI 16384  
SF 300.1334075 MHz  
OFFSET 11.993 ppm  
SR 3407.50 Hz  
HZPRT 0.238419 Hz  
MGM EN  
LB 0.00 Hz  
GB 0

1D NMR plot parameters  
CX 22.00 cm  
CY 10.00 cm  
FIP 10.500 ppm  
F1 3151.40 Hz  
F2 -0.500 ppm  
F2 -150.07 Hz  
PPMCH 0.50000 ppm/cm  
HZCM 150.06670 Hz/cm

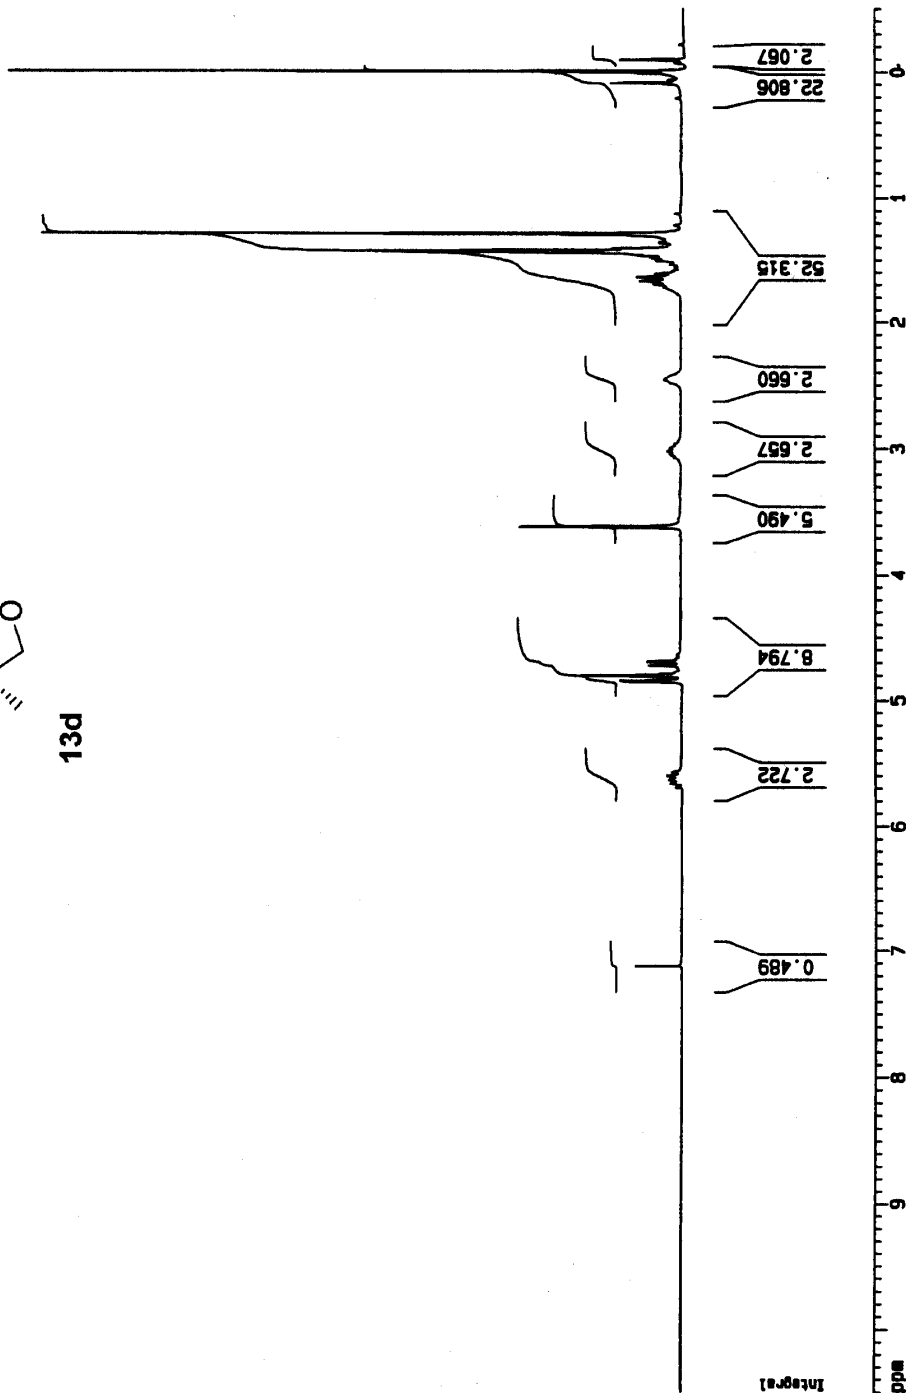

Spekters 216/F38  
Protonen-Spektrum

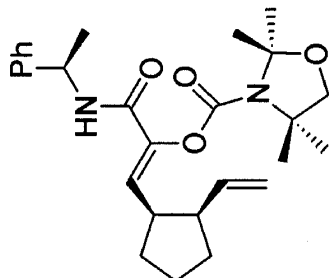

13e

Current Data Parameters  
NAME Apr 14  
EXPNO 201  
PROCNO 1

F2 - Acquisition Parameters  
Date 980414  
Time 18.01  
PULPROG zg30  
SOLVENT CDCl3  
AQ 4.1943240 sec  
FIDRES 0.119209 Hz  
AQ 128.0 usec  
RG 715  
NUCLEUS 1H  
D1 0.100000 sec  
P1 9.2 usec  
DE 160.0 usec  
SF01 300.1350537 MHz  
SMH 3906.25 Hz  
TD 32768  
NS 40  
DS 0

F1 - Processing Parameters  
SI 16384  
SF 300.1334272 MHz  
OFFSET 11.927 ppm  
SR 3427.20 Hz  
HZOPT 0.238419 Hz  
MAG 0.00 Hz  
LB 0.00 Hz  
GB 0

1D NMR plot parameters  
CX 22.00 cm  
CY 10.00 cm  
FIP 10.500 ppm  
F1 3151.40 Hz  
F2 -0.500 ppm  
F2 150.07 Hz  
PPMCH 0.50000 ppm/cm  
HZCH 150.06671 Hz/cm

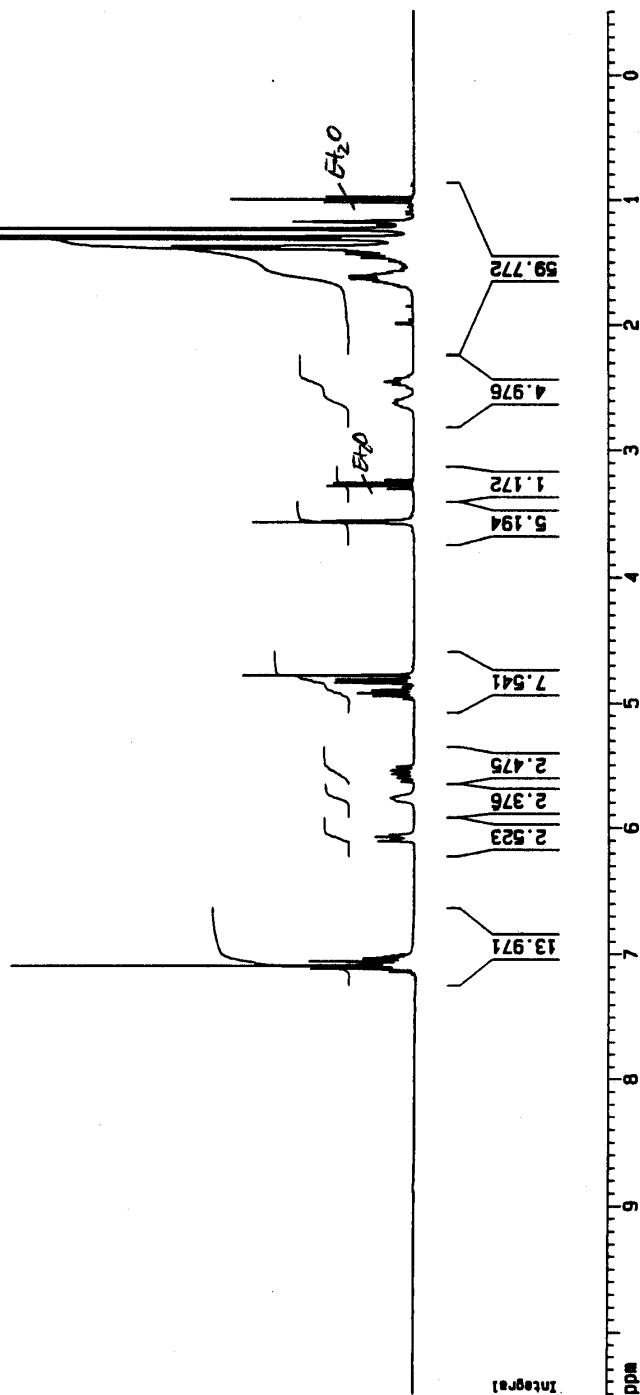

Deiters 218  
Protonen-Spektrum

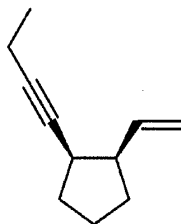

16

Current Data Parameters  
NAME Apr 15  
EXPNO 551  
PROCNO 1

F2 - Acquisition Parameters  
Date 980416  
Time 3.25  
PULPROG zg30  
SOLVENT CDCl3  
AQ 4.1943240 sec  
FIDRES 0.119209 Hz  
DM 128.0 usec  
RG 1430  
NUCLEUS 1H  
D1 0.1000000 sec  
P1 9.2 usec  
DE 150.0 usec  
SF01 300.1350537 MHz  
SWH 3906.25 Hz  
TD 32768  
NS 120  
DS 0

F1 - Processing Parameters  
SI 16384  
SF 300.1333558 MHz  
OFFSE1 12.065 ppm  
SR 3385.77 Hz  
HZQPT 0.238419 Hz  
WDW EM  
LB 0.00 Hz  
GB 0

1D NMR plot parameters  
CX 22.00 cm  
CY 10.00 cm  
F1P 10.500 ppm  
F1 3151.40 Hz  
F2P -0.500 ppm  
F2 -150.07 Hz  
PPMCH 0.50000 ppm/cm  
HZCH 150.06570 Hz/cm

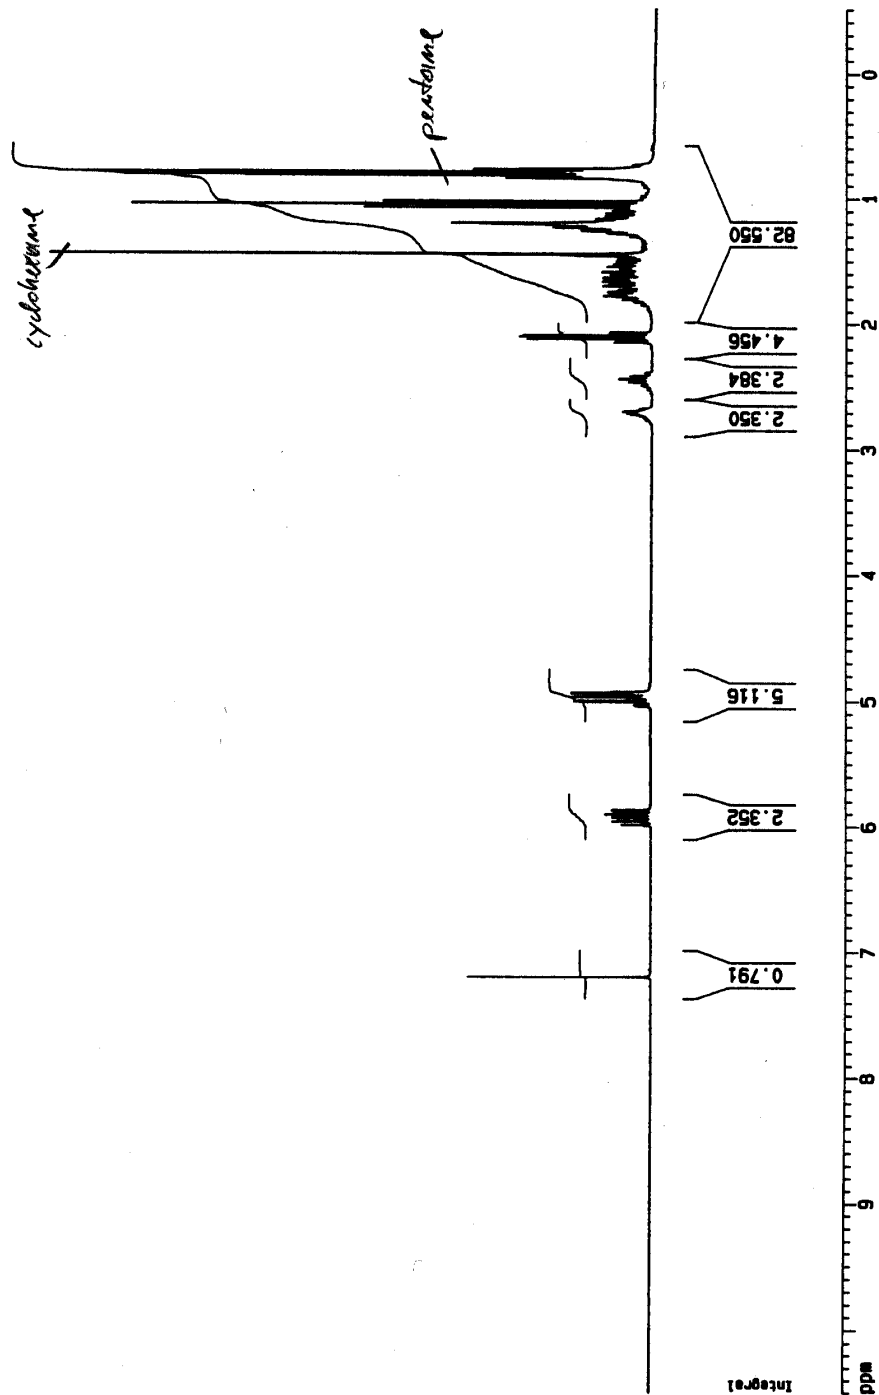

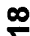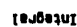

Deiters 255/F1  
Protonen-Spektrum

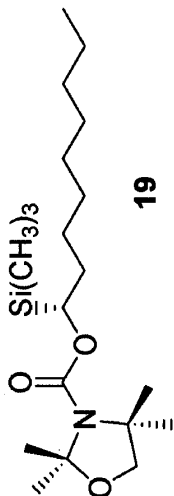

19

Current Data Parameters  
NAME Jun09  
EXPNO 121  
PROCNO 1

F2 - Acquisition Parameters  
Date 980609  
Time 22.49  
PULPROG zg30  
SOLVENT CDCl3  
AQ 4.1943240 sec  
FIDRES 0.119209 Hz  
AQ 128.0 usec  
RG 256  
NUCLEUS 1H  
D1 0.1000000 sec  
P1 9.2 usec  
DE 160.0 usec  
SF01 300.1350537 MHz  
SMH 3906.25 Hz  
TD 32768  
NS 40  
DS 0

F1 - Processing Parameters  
SI 16384  
SF 300.1333620 MHz  
OFFSET 12.077 ppm  
SR 3382.01 Hz  
HZPPT 0.238419 Hz  
MCM EN  
LB 0.00 Hz  
GB 0

1D NMR plot parameters  
CX 22.00 cm  
CY 10.00 cm  
F1P 10.500 ppm  
F1 3151.40 Hz  
F2P -0.500 ppm  
F2 -150.07 Hz  
PPMCH 0.50000 ppm/cm  
HZCM 150.06570 Hz/cm

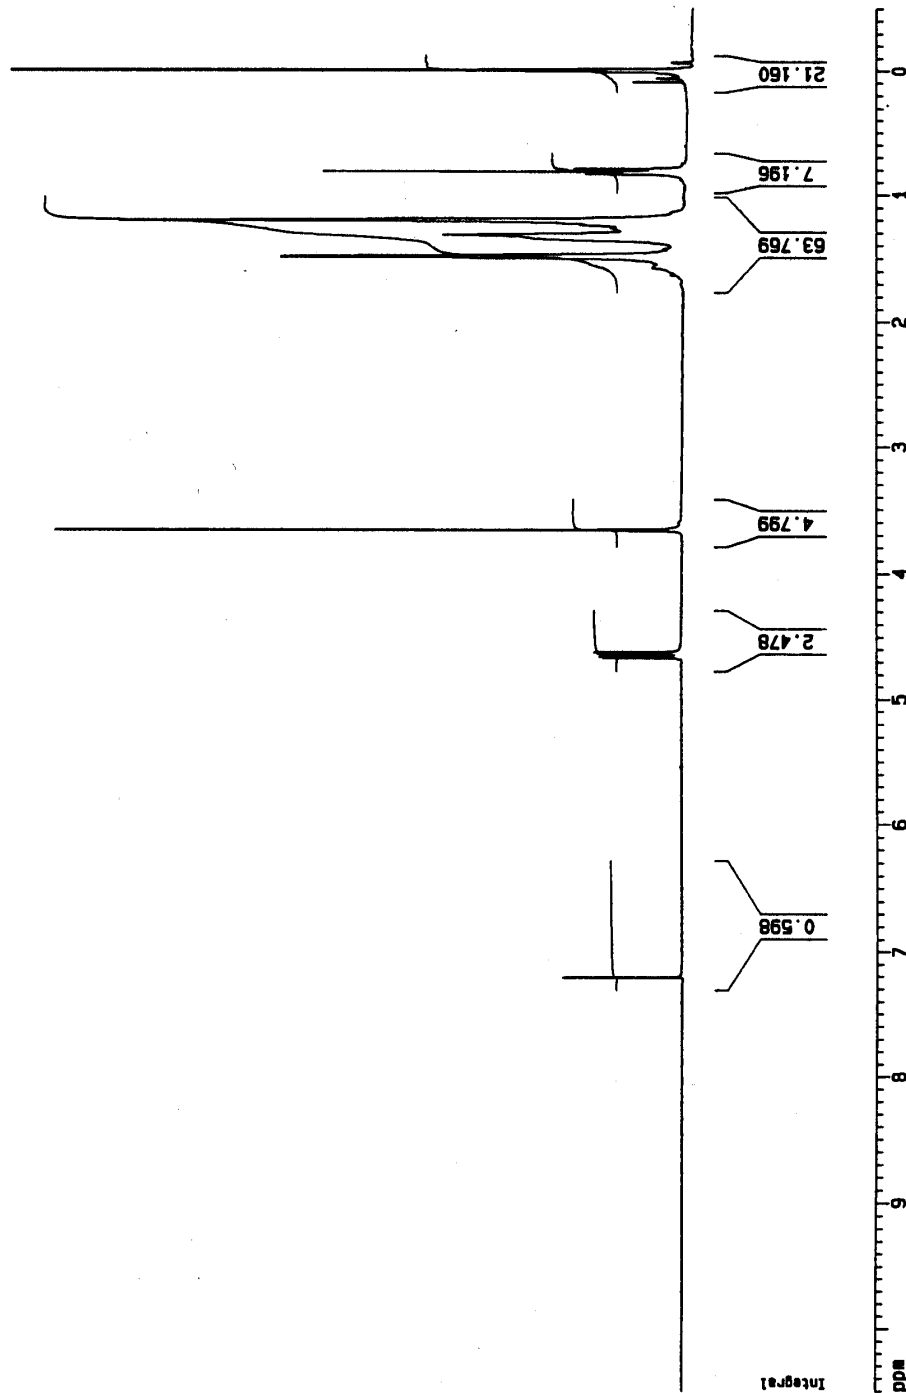

Deiters 252  
Protonen-Spektrum

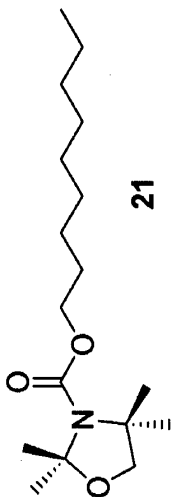

Current Data Parameters  
NAME Jun07  
EXPNO 201  
PROCNO 1

F2 - Acquisition Parameters  
Date 980607  
Time 17.35  
PULPROG zg30  
SOLVENT CDCl3  
AQ 4.1943240 sec  
FIDRES 0.115209 Hz  
AQ 128.0 usec  
RG 180  
NUCLEUS 1H  
D1 0.1000000 sec  
P1 9.2 usec  
DE 160.0 usec  
SF01 300.1350537 MHz  
SH 3906.25 Hz  
TO 32768  
NS 40  
DS 0

F1 - Processing Parameters  
SI 16384  
SF 300.1334274 MHz  
OFFSET 11.926 ppm  
SR 3427.40 Hz  
HZPPT 0.239419 Hz  
MCM CM  
LB 0.00 Hz  
GB 0

1D NMR plot parameters  
CX 22.00 cm  
CY 10.00 cm  
F1P 10.500 ppm  
F1 3151.40 Hz  
F2P -0.500 ppm  
F2 -150.07 Hz  
PPMCH 0.50000 ppm/cm  
HZCN 150.06671 Hz/cm

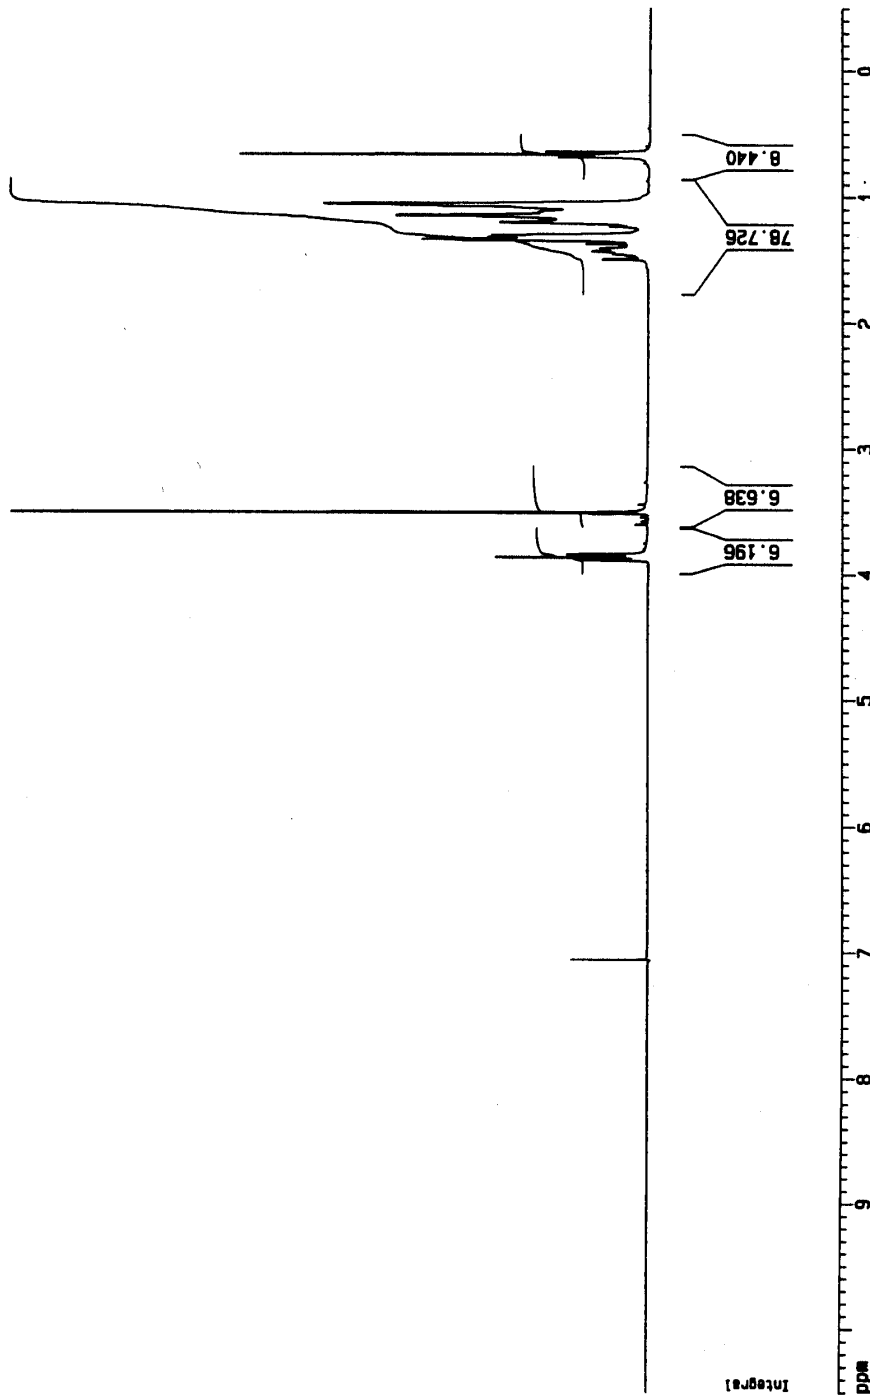

Deiters 259/F2

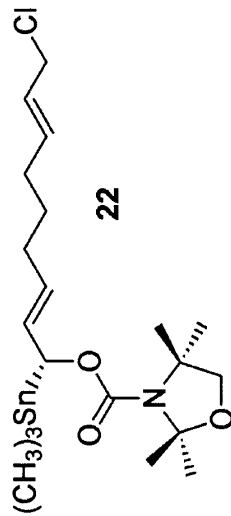

Current Data Parameters  
NAME Jun12  
EXPNO 150  
PROCNO 1

F2 - Acquisition Parameters  
Date 990612  
Time 11:56  
PULPROG zgpg30  
SOLVENT CDCl3  
AQ 4.1943240 sec  
FIDRES 0.119209 Hz  
AQ 128.0 usec  
RG 1024  
NUCLEUS 1H  
D1 0.100000 sec  
P1 9.2 usec  
DE 160.0 usec  
SF01 300.1350537 MHz  
SWH 3906.25 Hz  
TD 32768  
NS 40  
DS 0

F1 - Processing Parameters  
SI 16384  
SF 300.1334028 MHz  
OFFSE1 12.008 ppm  
SR 3402.77 Hz  
HZQPT 0.238419 Hz  
KON EM  
LB 0.00 Hz  
GB 0

1D NMR plot parameters  
CX 22.00 cm  
CY 10.00 cm  
FIP 10.500 ppm  
F1 3151.40 Hz  
F2 -0.500 ppm  
F2P -150.07 Hz  
PPHOM 0.50000 ppm/cm  
HZOM 150.06670 Hz/cm

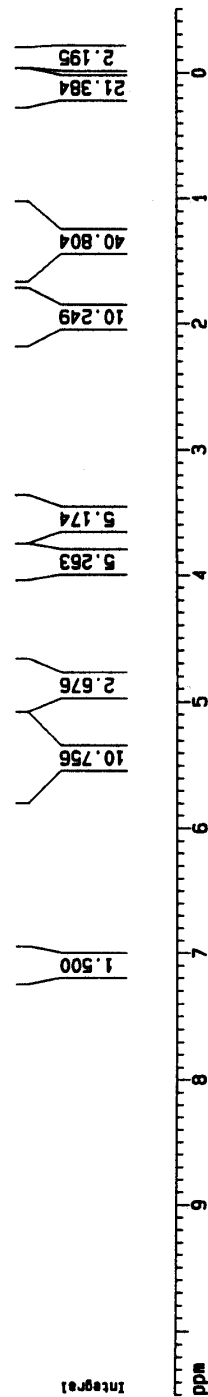

Supplement: Supplementary file 1 [file 5781627]
